# Supplementary material for: Potential Pathogenic Bacteria in Seminal Microbiota of Patients with Different Types of Dysspermatism
Source: PubMed Central journal article supplement (PMC7181748; doi:10.1038/s41598-020-63787-x), 2020-04-23
Supplement: 41598_2020_63787_MOESM1_ESM.pdf [file 41598_2020_63787_MOESM1_ESM.pdf]

## Supplementary materials for Manuscript # SREP-19-23883D

**Title:** Potential Pathogenic Bacteria in Seminal Microbiota of Patients with Different Types of Dysspermatism

**Running title:** Seminal microbiota in patients with dysspermatism

Huijun Yang<sup>1,2</sup>, Jiaming Zhang<sup>3,4</sup>, Zhiwei Xue<sup>1,2</sup>, Changying Zhao<sup>4,5</sup>, Lijun Lei<sup>1,2</sup>, Yan Wen<sup>1,2</sup>, Yunling Dong<sup>1,2</sup>, Junjie Yang<sup>3,6,7,8,\*</sup>, Lei Zhang<sup>5,9,\*</sup>

<sup>1</sup> *Maternal and Child Health Care Hospital of Shandong Province, Jinan 250000, China*

<sup>2</sup> *Key Laboratory of Birth Regulation and Control Technology of National Health Commission of China, & Key Laboratory for Improving Birth Outcome Technique of Shandong Province, Jinan 250000, China*

<sup>3</sup> *College of Life Science, Qilu Normal University, Jinan 250200, China*

<sup>4</sup> *Shandong Children's Microbiome Center, Qilu Children's Hospital of Shandong University, Jinan 250022, China*

<sup>5</sup> *Shandong Institute of Industrial Technology for Health Sciences and Precision Medicine, Jinan 250100, China*

<sup>6</sup> *Shandong Institutes for Food and Drug Control, Jinan 250101, China*

<sup>7</sup> *Qingdao Human Microbiome Center, Clinical Laboratory and Core Research Laboratory, The Affiliated Central Hospital of Qingdao University, Qingdao 266042, China*

<sup>8</sup> *Microbiological Laboratory, Lin Yi People's Hospital, Linyi 276000, China*

<sup>9</sup> *Beijing Advanced Innovation Center for Big Data-Based Precision Medicine, School of Medicine and Engineering, Beihang University, & Key Laboratory of Big Data-Based Precision Medicine (Beihang University), the Ministry of Industry and Information Technology of the People's Republic of China, Beijing 100191, China*

\* Corresponding authors

**Lead correspondence**

Lei Zhang, Ph.D.,

Prof. of Microbiology and BME

Microbiome-X Lab

Beijing Advanced Innovation Center for Big Data-Based Precision Medicine, School of Medicine and Engineering, Beihang University;

Key Laboratory of Big Data-Based Precision Medicine (Beihang University), the Ministry of Industry and Information Technology of the People's Republic of China

Beijing 100191, CHINA

M: +86 186 1826 8987

Email: microbiome@foxmail.com.

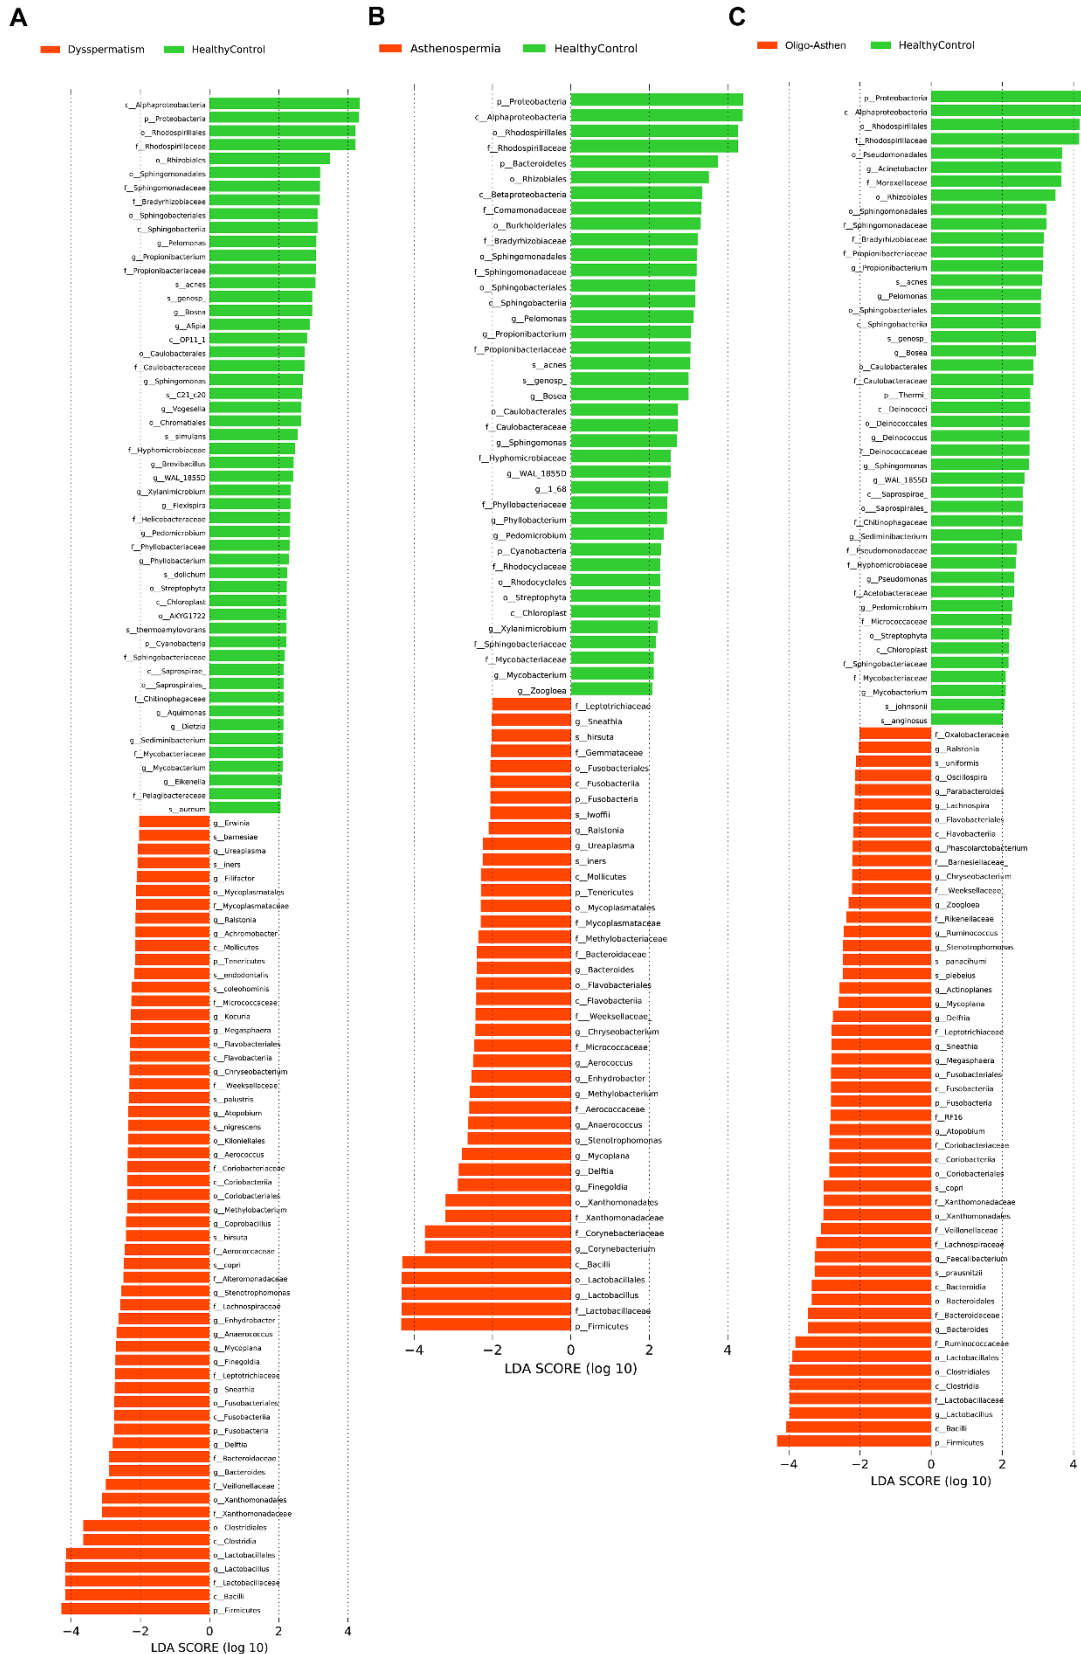

Figure S1. LefSe analysis between (A) dysspermatism and healthy control; (B)

asthenospermia and healthy control; (C) oligoasthenospermia and healthy control based on  $LDA > 2$ .

**Table S1. Effect of Age and pH on the Discovered Biomarkers for Asthenospermia vs. Healthy control**

|                         | Asthenospermia |       | Healthy control |       |
|-------------------------|----------------|-------|-----------------|-------|
|                         | age            | pH    | age             | pH    |
| Propionibacterium       | 0.877          | 0.688 | 0.099           | 0.46  |
| Lactobacillus           | 0.47           | 0.12  | 0.05            | 0.488 |
| Pelomonas               | 0.596          | 0.89  | 0.158           | 0.396 |
| Propionibacterium acnes | 0.88           | 0.699 | 0.1             | 0.467 |

The effects of each of the two factors, i.e. Age and pH on the validated biomarkers were examined within each of the 2 clinical categories by the SPSS one way ANOVA test. The effect was considered significant if  $p\text{-value} < 0.05$ .

**Table S2. Effect of Age and pH on the Discovered Biomarkers for Asthenooligospermia vs. Healthy control**

|                         | Asthenooligospermia |       | Healthy control |       |
|-------------------------|---------------------|-------|-----------------|-------|
|                         | age                 | pH    | age             | pH    |
| Propionibacterium       | 0.274               | 0.436 | 0.099           | 0.46  |
| Lactobacillus           | 0.95                | 0.022 | 0.05            | 0.488 |
| Pelomonas               | 0.297               | 0.701 | 0.158           | 0.396 |
| Acinetobacter           | 0.112               | 0.332 | 0.994           | 0.785 |
| Propionibacterium acnes | 0.272               | 0.441 | 0.1             | 0.467 |
| Prevotella copri        | 0.184               | 0.841 | 0.17            | 0.143 |

The effects of each of the two factors, i.e. Age and pH on the validated biomarkers were examined within each of the 2 clinical categories by the SPSS one way ANOVA test. The effect was considered significant if  $p\text{-value} < 0.05$ .
